# Supplementary material for: Lifetime elongation of quantum-dot light-emitting diodes by inhibiting the degradation of hole transport layer
Source: Royal Society of Chemistry journal article supplement (doi:10.1039/d1ra03310g), 2021-01-01
Supplement: d1ra03310g1.pdf [file d1ra03310g1.pdf]

## Supporting Information

### Lifetime Elongation of Quantum-Dot Light-Emitting Diodes by Inhibiting Degradation of Hole Transport Layer

Bo-Yen Lin,<sup>a</sup> Wen-Chen Ding,<sup>b</sup> Chia-Hsun Chen,<sup>b</sup> Ya-Pei Kuo,<sup>c</sup> Jiun-Haw Lee,<sup>\*b</sup> Chun-Yu Lee<sup>\*c</sup> and Tien-Lung Chiu<sup>\*a</sup>

<sup>a</sup> Department of Electrical Engineering, Yuan Ze University, Taoyuan 32003, Taiwan. E-mail: tlchiu@saturn.yzu.edu.tw.

<sup>b</sup> Graduate Institute of Photonics and Optoelectronics, Department of Electrical Engineering, National Taiwan University, Taipei 10617, Taiwan. E-mail: jiunhawlee@ntu.edu.tw.

<sup>c</sup> AU Optronics Corporation, Hsinchu, Taiwan. E-mail: d01941010@ntu.edu.tw.

### Figure S1

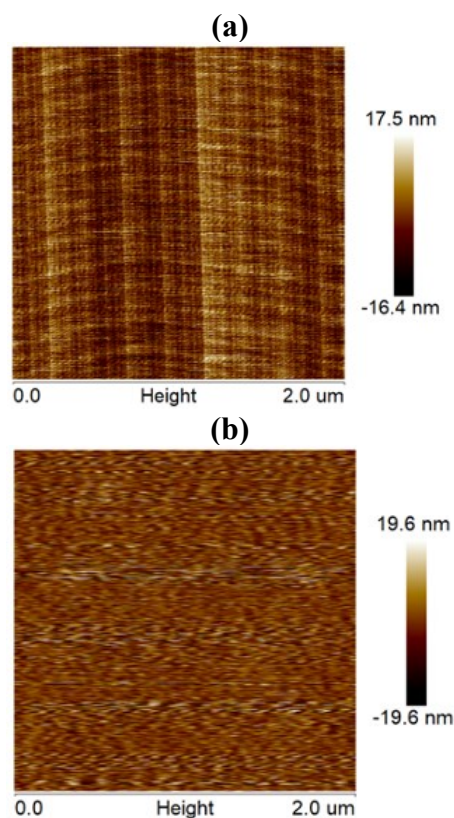

**Figure S1.** AFM image (a) TFB and (b) PVK

## Figure S2

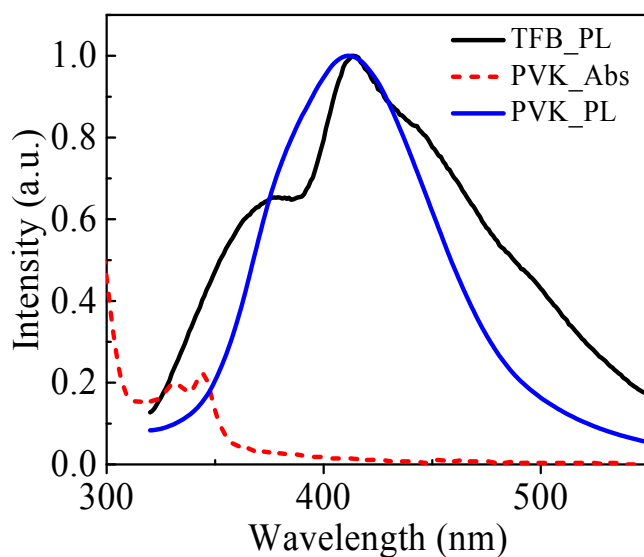

**Figure S2.** PL and absorption spectra of TFB and PVK

### Transient electroluminescence (TREL)

TREL is to applied a rectangular pulse waveform to a QDLED, and the corresponding electrical current and electroluminescent (EL) response of device can be observed as illustrated in Fig. S3 [Ref. 39: *J. Appl. Phys.*, 89, 1704 (2001)], where one can see the time between the turn-on of pulse and EL response defined as delay time ( $T_d$ ).

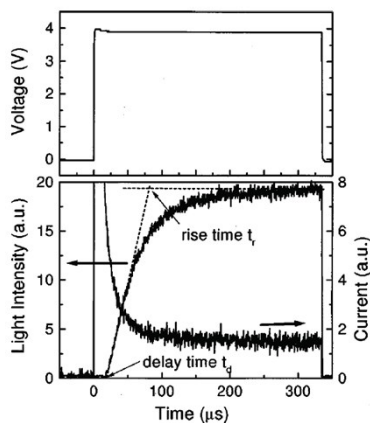

**Figure S3.** TREL measurement: the corresponding electrical pulse waveform, corresponding

current density and optical intensity of device.

Delay time is typically attributable to the timespan of carrier injection and transport to the emission zone. Based on some assumptions such as assuming that the emitting is unipolar, and thereby the delay time can be expressed into Eq. (R1) [Ref. 40: *J. Appl. Phys.*, 94, 7796 (2003); Ref. 41: *Sci. Technol.*, 19, L56-L59 (2004)]:

$$T_d = T_{inj} + T_{trans} \approx (R + R_0)C_i S \frac{E_{th}}{E_0} + \frac{d}{\mu E_{th}} \dots\dots\dots(S1)$$

Where R, R<sub>0</sub> and C<sub>i</sub> represent the series resistance of device. E<sub>th</sub> is the threshold electric field for charge injection, and E<sub>0</sub> is the electric field of the applied pulse voltage. T<sub>d</sub> consist of two parts in terms of T<sub>inj</sub> and T<sub>trans</sub>. T<sub>inj</sub> is for carrier injection and T<sub>trans</sub> is for carrier transporting. Accordingly, TREL is believed as a suitable method to characterize the carrier dynamics. Furthermore, electron transporting is superior than hole transporting due to the utilization of zinc oxide (ZnO) as electron transporting layer in QDLED, and the T<sub>d</sub> is therefore dependent on the time of hole transporting. In current case, PVK layer is the difference between TFB and TFB/PVK devices and also the injection term T<sub>inj</sub> could be assumed identical because of the same electrode and adjacent carrier transport layer. Hence, to calculate the T<sub>d</sub> difference between TFB and TFB/PVK devices, which could reflect the hole transporting difference induced by PVK since above assumption. For example, as show in Figs. 4a and b, the T<sub>d</sub> difference was 0.75 μs. If following down below calculations, the hole transporting mobility of approximately 7.46 × 10<sup>-6</sup> (cm<sup>2</sup>S<sup>-1</sup>V<sup>-1</sup>) induced by PVK was obtained, and which totally agree with previous literature [ Ref:37 *RSC Adv.* 2017, 7(69), 43366–43372.].

$$\mu = \frac{d(\text{difference})}{T_d(\text{difference})E_{th}} = \frac{28 * 10^{-7}(cm)}{0.75 * 10^{-6}(s) \times 5(V)/100 * 10^{-7}(cm)} = 7.46 * 10^{-6} \text{ (cm}^2\text{/VS)}$$
